# Supplementary material for: Impact of a Whole-Food, High-Soluble Fiber Diet on the Gut–Muscle Axis in Aged Mice
Source: MDPI journal article supplement (doi:10.3390/nu16091323), 2024-04-28

**Supplementary Figure S1** Experimental Timeline: 7-weeks before the dietary intervention, body composition, grip strength, and treadmill endurance capacity were assessed, and feces was collected. 2- and 6-weeks after initiating the dietary intervention, body composition and grip strength were evaluated; feces was collected at the week-6 time point. Treadmill endurance capacity was quantified 7 - 8 weeks after initiating the dietary intervention. After 10 weeks on the study diets, skeletal muscle mass was harvested, feces and blood were collected.

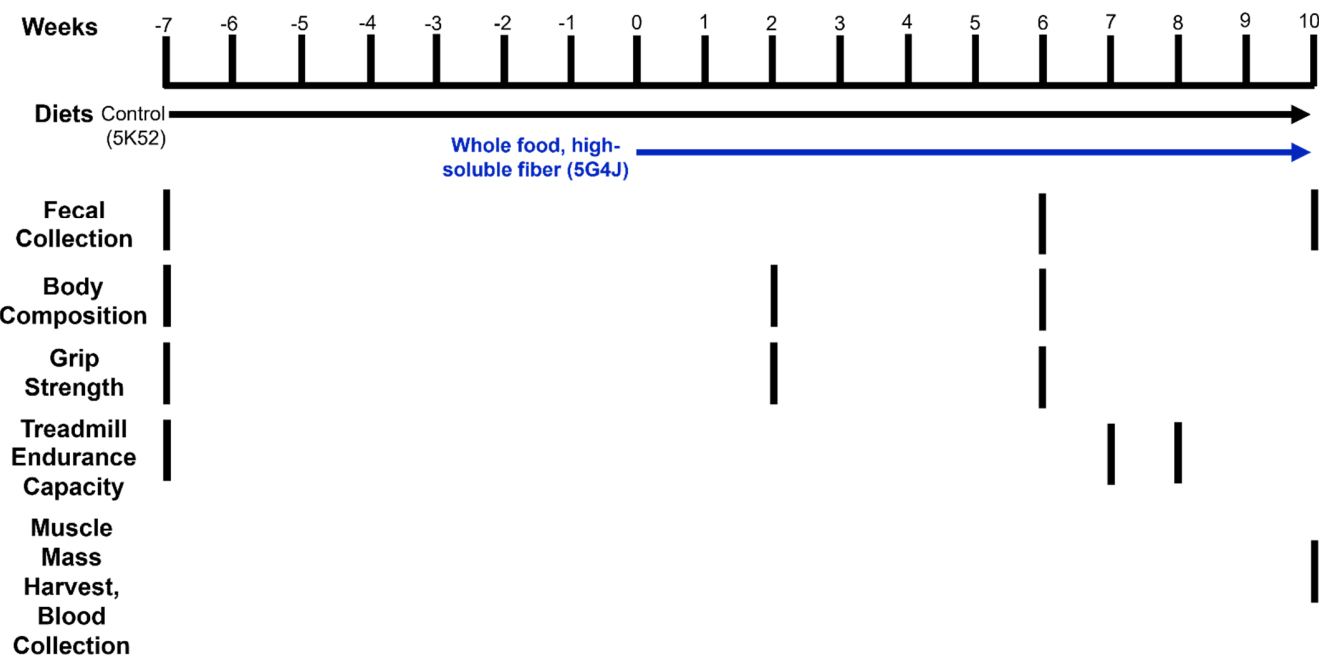

**Supplementary Figure S2** Week 6 and Week 10 change from baseline for  $\alpha$ -diversity measures, including evenness (A, B) and the Shannon index (C, D), respectively. Between-group data for all mice (blue, orange bars), females (grey, yellow), and males (light blue, green) is shown.

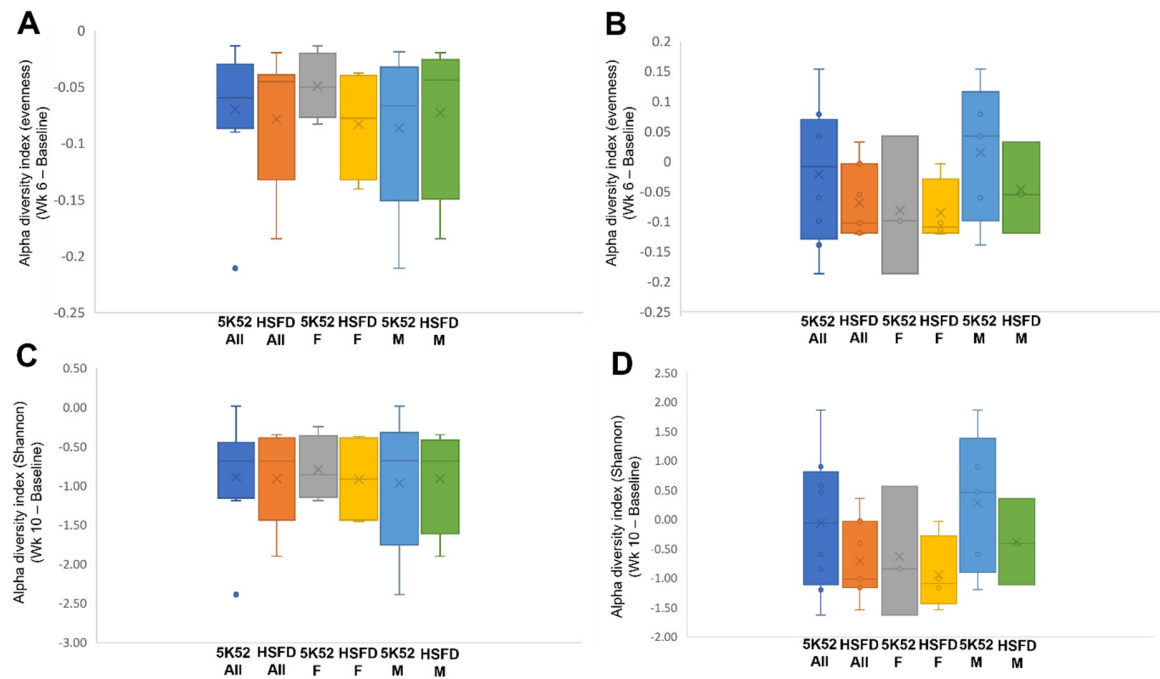

**Supplementary Figure S3** Phyla relative abundance in HSFD- and control-fed mice for baseline vs Week 6 (A), and baseline vs Week 10 (B).

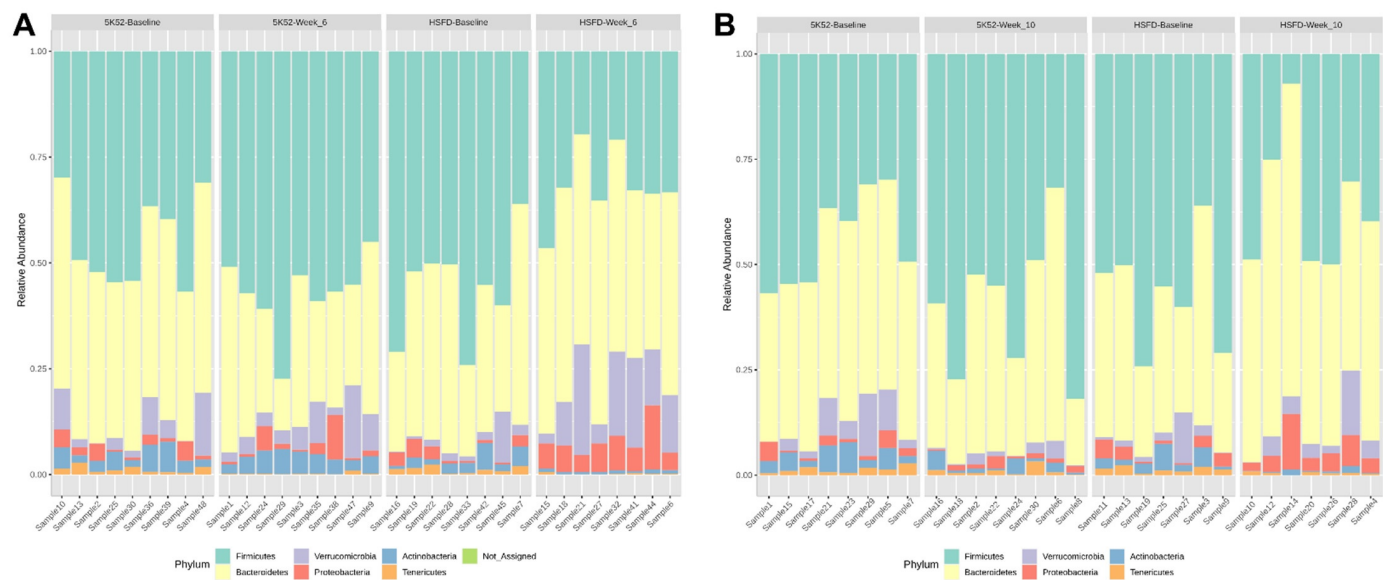

Supplement: s1 [file s1]
